# Supplementary material for: Lytic transglycosylases mitigate periplasmic crowding by degrading soluble cell wall turnover products
Source: eLife journal article supplement (doi:10.7554/elife.73178), 2022-01-24
Supplement: fig1-data1 [file elife-73178-fig1-data1-v2.zip]

Probe 1:  $\alpha$ -mCherry

Probe 2:  $\alpha$ -RpoA

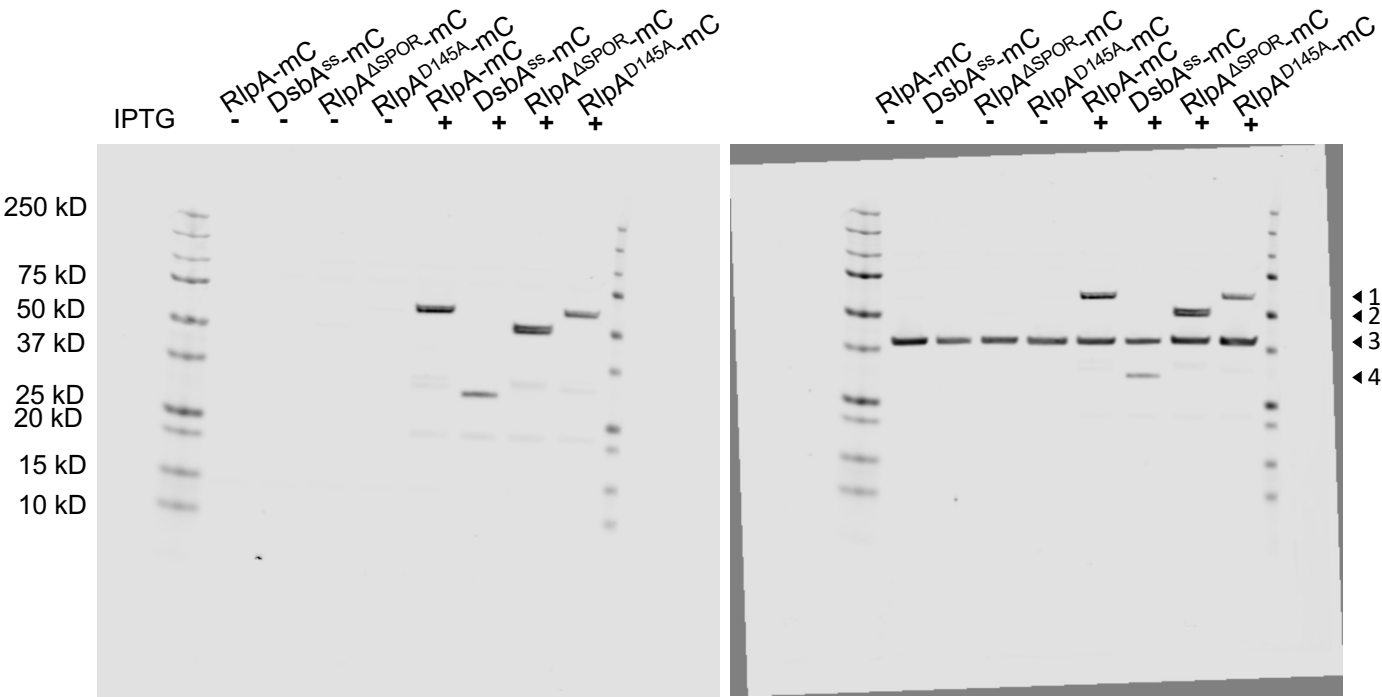

| Major Band | Annotation                                                                    | Approx. Predicted Size |
|------------|-------------------------------------------------------------------------------|------------------------|
| 1          | Full length RlpA-mCherry fusion                                               | 55 kD                  |
| 2          | RlpA <sup>ΔSPOR</sup> -mCherry fusion                                         | 46 kD                  |
| 3          | RpoA                                                                          | 37 kD                  |
| 4          | DsbA <sup>ss</sup> - mCherry<br>(Mature, secreted and signal peptide-cleaved) | 27 kD                  |
